# Supplementary material for: Identification of human-to-human transmissibility factors in PB2 proteins of influenza A by large-scale mutual information analysis
Source: PubMed Central journal article supplement (PMC2259419; doi:10.1186/1471-2105-9-s1-s18), 2008-02-13
Supplement: 1471-2105-9-S1-S18-S1.pdf [file 1471-2105-9-S1-S18-S1.pdf]

Olivo Miotto, AT Heiny, Tin Wee Tan, J Thomas August, Vladimir Brusic

## **Identification of human-to-human transmissibility factors in PB2 proteins of influenza A by large-scale mutual information analysis**

### **Additional Materials**

#### **Contents**

**Table S1.** List of GenPept accession numbers for the sequences used to produce the timeline in Figure 6 (Human sequences).

**Table S2.** List of GenPept accession numbers for the sequences used to produce the timeline in Figure 7 (Swine sequences).

**Table S3.** List of GenPept accession numbers for the sequences used to produce the timeline in Figure 8 (Human H5N1 sequences).

**Table S1.** List of GenPept accession numbers for the sequences used to produce the timeline in Figure 6 (Human sequences). The sequences are listed in the order in which they appear in Figure 6.

ABA55038.1  
ABF47965.1  
ABD77806.1  
ABD77685.1  
ABD62791.1  
ABI20836.1  
ABD62852.1  
ABD79111.1  
ABD79122.1  
ABD77817.1  
ABD61745.1  
ABD60976.1  
ABD15269.1  
AAO46250.1  
ABI84969.1  
AAA19213.2  
AAA43127.1  
AAO46252.1  
AAO46253.1  
AAO46254.1  
AAO46255.1  
AAO46256.1  
AAO46257.1  
ABF21233.1  
AAO46259.1  
AAO46258.1  
AAA43595.1  
AAO46260.1  
AAO46261.1  
AAO46262.1  
AAO46266.1  
AAO46264.1  
AAO46263.1  
AAO46265.1  
YP\_308855.1  
AAO46267.1  
AAA43613.1  
ABI92290.1  
ABC84399.1  
AAK51712.1  
AAO46493.1  
AAO46494.1  
AAO46495.1  
ABB54524.1  
AAO46496.1  
ABB80044.1  
AAO46497.1  
AAO46498.1

**Table S2.** List of GenPept accession numbers for the sequences used to produce the timeline in Figure 7 (Swine sequences). The sequences are listed in the sequences in which they appear in Figure 7.

AAA43126.1  
AAA43649.1  
AAA43125.1  
ABD95721.1  
ABD61561.1  
ABD61259.1  
CAC36998.1  
CAC84738.1  
CAC84739.1  
AAG01757.1  
AAO15321.1  
CAC84745.1  
CAC84743.1  
AAL30473.1  
AAD51247.1  
AAL14086.1  
CAC37000.1  
AAF76002.1  
CAC84741.1  
AAR12289.1  
AAG01775.1  
AAL87932.1  
AAR12291.1  
AAR12280.1  
AAR12281.1  
AAR12292.1  
AAR12293.1  
ABD62842.1  
AAU25862.1  
AAL87933.1  
AAN46834.1  
AAR12294.1  
AAR12285.1  
AAR12295.1  
ABB86900.1  
ABB86870.1  
ABB86910.1  
BAF03572.1  
AAU05323.1  
ABB86880.1  
ABB86940.1  
ABB86930.1  
AAZ79398.1  
ABA46960.1  
ABE27174.1  
AAV67991.1  
AAV68028.1  
ABF18003.1

**Table S3.** List of GenPept accession numbers for the sequences used to produce the timeline in Figure 8 (Human H5N1 sequences). The sequences are listed in the sequences in which they appear in Figure 8.

CAB95862.1  
AAK49373.1  
AAF74311.1  
AAF74312.1  
AAF74313.1  
AAK49376.1  
AAK49377.1  
AAK49379.1  
AAK49380.1  
AAT39029.1  
BAE07198.1  
AAV35117.1  
AAV32653.1  
AAT73549.1  
AAT73552.1  
ABF01745.1  
ABI35999.1  
ABI36213.1  
ABI36223.1  
ABI36227.1  
ABI36008.1  
ABC72647.1  
ABD16291.1  
AAZ72955.1  
ABF01749.1  
ABF01751.1  
ABG23659.1  
ABI36234.1  
ABI36248.1  
ABI36254.1  
ABI36259.1  
ABI36263.1  
ABI36274.1  
ABI36194.1  
ABI36305.1  
ABI36140.1  
ABI36162.1  
ABI36173.1  
ABI36306.1  
ABI36311.1  
ABI36344.1  
ABI36366.1  
ABI36377.1  
ABI36482.1  
ABI36443.1  
ABI36454.1  
ABI49392.1  
ABI49403.1
